# Supplementary material for: A 3D neutral chalcogenide framework built from a supertetrahedral T3 cluster and a metal complex for the electrocatalytic oxygen reduction reaction
Source: Royal Society of Chemistry journal article supplement (doi:10.1039/c7dt04891b), 2018-01-01
Supplement: c7dt04891b1.pdf [file c7dt04891b1.pdf]

*Supporting information for*

**A 3D Neutral Chalcogenide Framework Built from  
Supertetrahedral T3 Cluster and Metal Complex for  
Electrocatalytic Oxygen Reduction Reaction**

Yingying Zhang,<sup>‡</sup> Dandan Hu,<sup>‡</sup> Chaozhuang Xue, Huajun Yang, Xiang Wang, Tao Wu\*

College of Chemistry, Chemical Engineering and Materials Science, Soochow University, Suzhou,  
Jiangsu 215123, China.

<sup>‡</sup> These authors contributed equally to this work.

## Materials

Gallium oxide ( $\text{Ga}_2\text{O}_3$ , 99.9%, powder), sulfur (S, 99.9%, powder), manganese acetate tetrahydrate ( $\text{Mn}(\text{AC})_2 \cdot 4\text{H}_2\text{O}$ , 97.0%, powder), tin (Sn, 99.9%, powder), 1,2-diaminocyclohexane ( $\text{C}_6\text{H}_{14}\text{N}_2$ , 97%, liquid), potassium hydroxide (KOH, 85%, bulk), carbon black (CB, VXC-72), Pt/C (10 wt%, powder), deionized water were all used without further purification.

## Synthesis of $[\text{Mn}_2\text{Ga}_4\text{Sn}_4\text{S}_{20}] \cdot 4[\text{Mn}(\text{dach})_2]$ (denoted as NCF-4)

S powder (96 mg, 3.00 mmol),  $\text{Ga}_2\text{O}_3$  (62 mg, 0.33 mmol), Sn powder (115 mg, 0.97 mmol),  $\text{Mn}(\text{AC})_2 \cdot 4\text{H}_2\text{O}$  (62 mg, 0.28 mmol),  $\text{H}_2\text{O}$  (0.5 mL) and 1,2-diaminocyclohexane (2 mL) was mixed in a 23 mL Teflon-lined stainless-steel autoclave with stirring for about 30 min at room temperature. Then the vessel was sealed and heated to 180 °C for 7 days. After ultrasonic treatment and wash with ethanol and deionized water, yellowish-brown octahedral crystals were obtained (Yield: ~30% based on  $\text{Ga}_2\text{O}_3$ ). Elemental analysis for  $[\text{Mn}_2\text{Ga}_4\text{Sn}_4\text{S}_{20}] \cdot 4[\text{Mn}(\text{dach})_2]$ , calcd (%): C 21.85, H 4.29, N 8.50; found: C 24.27, H 5.01, N 9.15.

## Material Characterizations

The as-synthesized crystalline sample was characterized by power X-ray diffraction that was collected on a desktop diffractometer (D2 PHASER, Bruker, Germany) using  $\text{Cu-K}\alpha$  radiation operated at 30 kV and 10 mA. The thermogravimetry (TG) was measured with TG 209 F1 Libra. The single-crystal X-ray diffraction measurements were performed on Agilent diffractometers with graphite monochromated  $\text{Mo K}\alpha$  ( $\lambda = 0.71073 \text{ \AA}$ ) radiation at 296 K. The structure was solved by direct method using SHELXS-97 and the refinement against all reflections of the compound was performed using SHELXL-97. Energy dispersive spectroscopy (EDS) and scanning electron microscope (SEM) were performed on SU1510 with an accelerating voltage 25 kV. A Varian 710-ES inductively coupled plasma optical emission spectrometry (ICP-OES) instrument was used to determine the concentrations of  $\text{Ga}^{3+}$ / $\text{Mn}^{2+}$ . Room-temperature solid-state UV-Vis diffusion reflectance spectrum of sample was measured on a UV-3600. Fourier transform infrared spectrum of sample was measured on a HYPERION 2000.

## Electrochemical measurements

Electrochemical experiments were performed in a typical three-electrode electrochemical system with CHI-750E instrument coupled with a RDE. The three-electrode system is composed of a glassy carbon as working electrode (GRE), a KCl saturated  $\text{Ag}|\text{AgCl}$  electrode as reference, and a Pt wire as counter electrode. The homogeneous inks were prepared by mixing 2 mg compound 1 and 1 mg carbon black (CB) in 400  $\mu\text{L}$  deionized water, 100  $\mu\text{L}$  EtOH and 20  $\mu\text{L}$  Nafion. The inks were sonicated (the frequency is 40KHz, the power is 240W) for 30 min to make them forming more uniform sizes. Then 7  $\mu\text{L}$  inks were coated onto a clean GCE (4 mm in diameter) and dried at room temperature for the following electrochemical measurements. Cyclic voltammetry (CV) was performed at a scanning rate of 50 mV/s after purging high pure  $\text{O}_2$  or  $\text{N}_2$  gas for 30 min. Linear sweep voltammetry (LSV) was performed with the RDE in the  $\text{O}_2$ -saturated 0.1 M KOH solution at rotation speeds 1600 rpm with a scan rate of 5 mV/s. All electrochemical experiments were performed at room temperature.

$$n = \frac{4I_{\text{disk}}}{\frac{I_{\text{ring}}}{N} + I_{\text{disk}}}$$

$$\text{H}_2\text{O}_2\% = \frac{200 \frac{I_{\text{ring}}}{N}}{\frac{I_{\text{ring}}}{N} + I_{\text{disk}}}$$

where  $I_{\text{disk}}$  is the disk electrode current,  $I_{\text{ring}}$  is the ring electrode current and  $N$  is collection efficiency of the ring electrode (Pt).  $N$  was determined to be 0.42 according to the literature, in agreement with the value provided by the manufacturer (0.42).

Linear sweep voltammetry (LSV) was performed with the RDE in the O<sub>2</sub>-saturated 0.1 M KOH solution at rotation speeds varying from 625 to 1600 rpm with a scan rate of 5 mV/s. Koutecký–Levich (K–L) plots were analyzed at various electrode potentials (-0.35, -0.45, -0.55, -0.65 and -0.75 vs. Ag/AgCl). The slopes of their linear fit lines are used to assess the number of electrons ( $n$ ) transferred per oxygen molecule on the basis of the K–L equation:

$$\frac{1}{j} = \frac{1}{j_L} + \frac{1}{j_K} = \frac{1}{B\omega^{1/2}} + \frac{1}{j_K} \quad (1)$$

$$B = 0.62nFC_0D_0^{3/2}\nu^{-1/6} \quad (2)$$

$$j_K = nFkC_0 \quad (3)$$

where  $j$  is the measured current density,  $j_K$  and  $j_L$  are the kinetic and diffusion-limiting current densities,  $\omega$  is the electrode rotation rate,  $n$  is the number of electrons transferred per O<sub>2</sub>,  $F$  is the Faraday constant,  $C_0$  is the bulk concentration of O<sub>2</sub>,  $D_0$  is the diffusion coefficient of O<sub>2</sub>,  $\nu$  is the kinematic viscosity of the electrolyte, and  $k$  is the electron-transfer rate constant.

**Table S1.** The crystal data and refinement details of NCF-4.

| <b>NCF-4</b>                                                                |                                                                                                                  |
|-----------------------------------------------------------------------------|------------------------------------------------------------------------------------------------------------------|
| Formula                                                                     | Mn <sub>6</sub> Ga <sub>4</sub> Sn <sub>4</sub> S <sub>20</sub> C <sub>48</sub> N <sub>16</sub> H <sub>112</sub> |
| Formula weight                                                              | 2638.10                                                                                                          |
| Crystal system                                                              | tetragonal                                                                                                       |
| Z                                                                           | 4                                                                                                                |
| Space group                                                                 | <i>I</i> 4 <sub>1</sub> / <i>a</i>                                                                               |
| <i>a</i> (Å)                                                                | 23.3697(4)                                                                                                       |
| <i>b</i> (Å)                                                                | 23.3697(4)                                                                                                       |
| <i>c</i> (Å)                                                                | 20.7308(9)                                                                                                       |
| $\beta$ (°)                                                                 | 90                                                                                                               |
| <i>V</i> (Å <sup>3</sup> )                                                  | 11322.0(6)                                                                                                       |
| <i>T</i> /K                                                                 | 296                                                                                                              |
| <i>F</i> (000)                                                              | 5224                                                                                                             |
| $\mu$ (mm <sup>-1</sup> )                                                   | 2.845                                                                                                            |
| <i>D</i> (g cm <sup>-3</sup> )                                              | 1.548                                                                                                            |
| GOF on <i>F</i> <sup>2</sup>                                                | 1.076                                                                                                            |
| <i>R</i> <sub>1</sub> , <i>wR</i> <sub>2</sub> ( <i>I</i> > 2σ( <i>I</i> )) | 0.0434, 0.0910                                                                                                   |
| <i>R</i> <sub>1</sub> , <i>wR</i> <sub>2</sub> ( <i>all</i> )               | 0.0730, 0.1084                                                                                                   |

**Table S2.** The ICP-OES analysis of NCF-4.

| Sample | Time          | Mn     | Ga     | Mn:Ga  |
|--------|---------------|--------|--------|--------|
| NCF-4  | 1             | 1.1249 | 0.7600 | 1.48:1 |
| NCF-4  | 2             | 1.1208 | 0.7677 | 1.46:1 |
| NCF-4  | 3             | 1.1320 | 0.7628 | 1.48:1 |
| NCF-4  | average value | 1.1259 | 0.7635 | 1.47:1 |

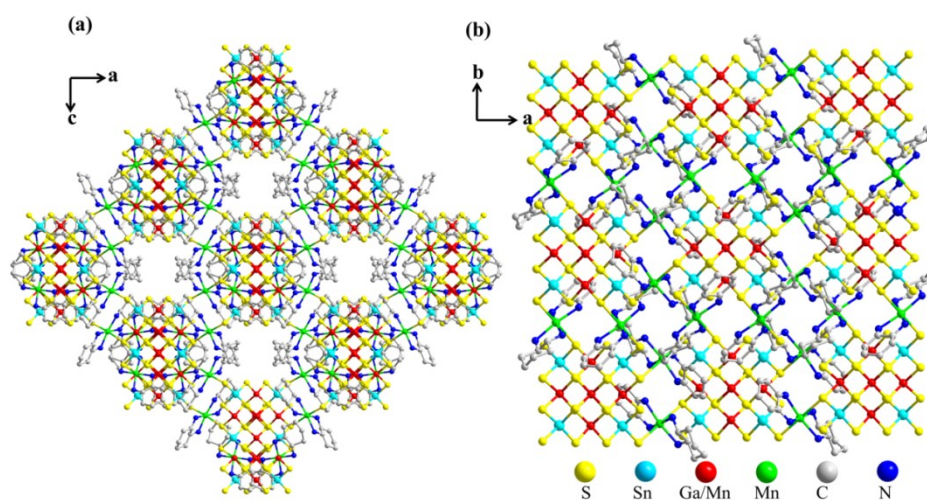

**Fig. S1** 3D structures of NCF-4 viewed along *b* axis (a) and *c* axis (b).

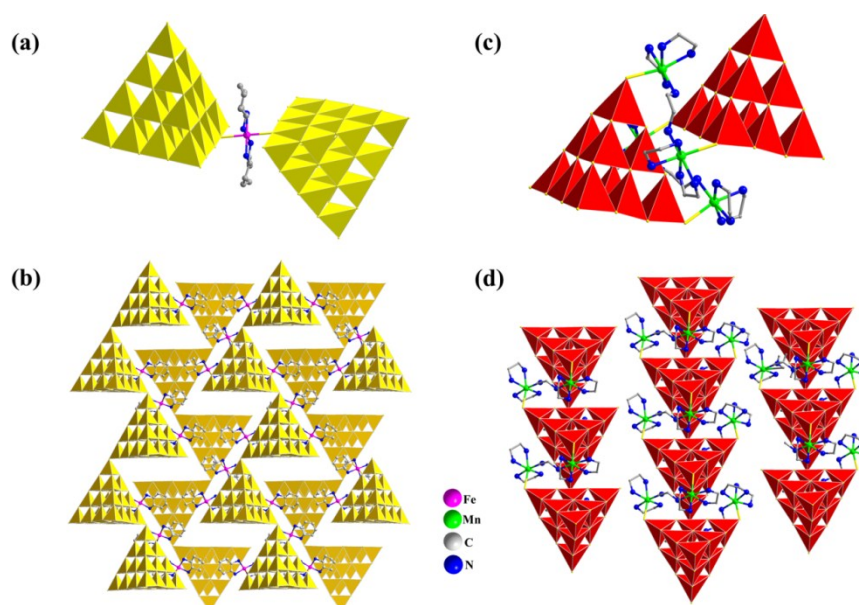

**Fig. S2** (a) Inter-clusters T4-Fe edge-edge connection mode by metal complex; (b) 2D polyhedron of T4-Fe viewed along *c* axis; (c) connection mode between  $[\text{Mn}_2(\text{en})_5]^{4+}$  complex and  $[\text{Mn}_2\text{Ga}_4\text{Sn}_4\text{S}_{20}]^{8-}$  T3 nanocluster; (d) the packing pattern of  $[\text{Mn}_2(\text{en})_5][\text{MnGa}_2\text{Sn}_2\text{S}_{10}]$ .

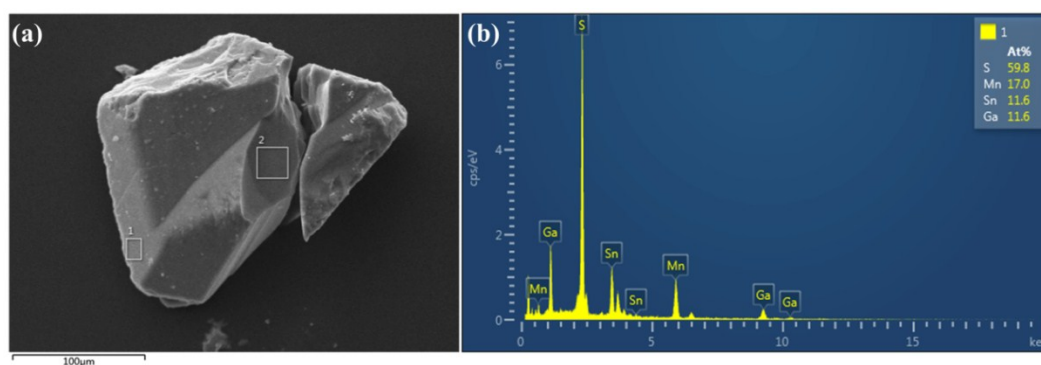

**Fig. S3** (a) SEM image of as-synthesized NCF-4, (b) energy dispersive spectroscopy (EDS) of NCF-4.

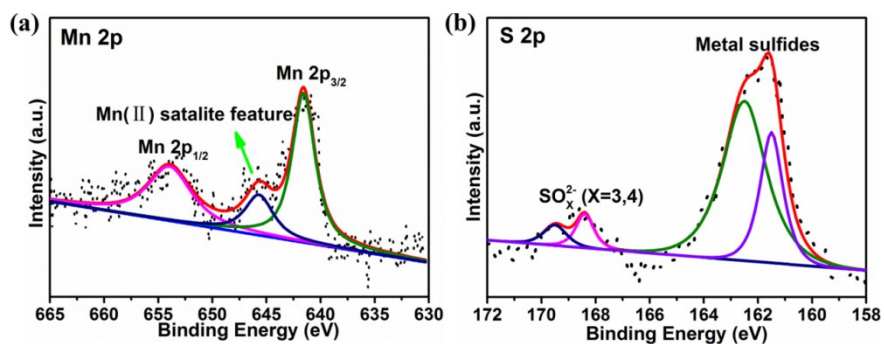

**Fig. S4** High-resolution XPS spectra of Mn 2p (a) and S 2p (b) in NCF-4.

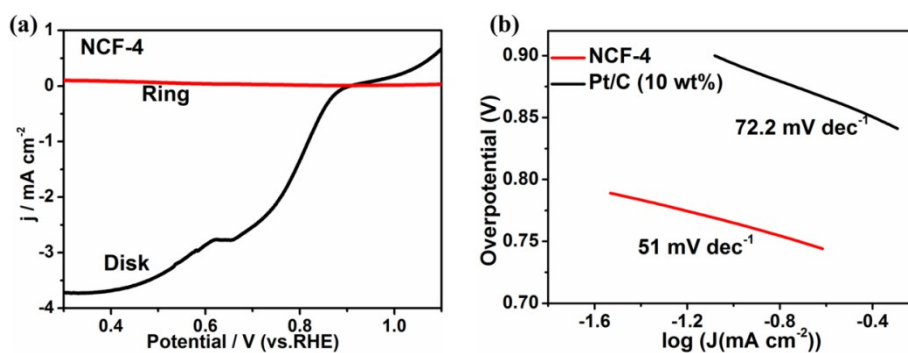

**Fig. S5** (a) RRDE curves of NCF-4 in O<sub>2</sub>-saturated 0.1 M KOH solution with a sweep rate of 5 mV s<sup>-1</sup> at a rotation rate of 1600 rpm; (b) the Tafel slope of NCF-4 and Pt/C (10 wt%).

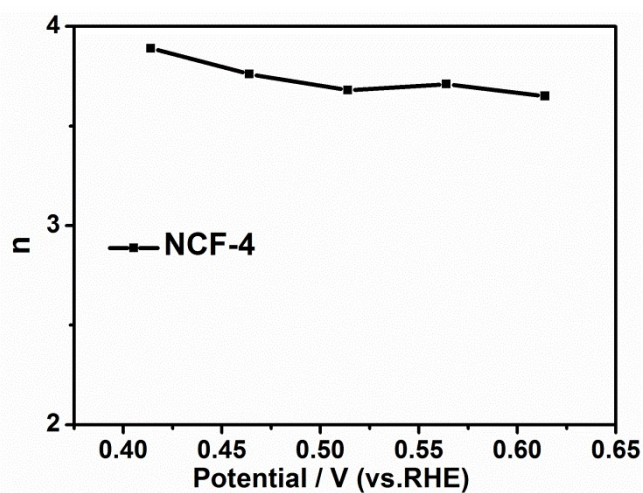

**Fig. S6** Electron-transfer numbers ( $n$ ) of NCF-4 derived from K-L plots at different potentials.

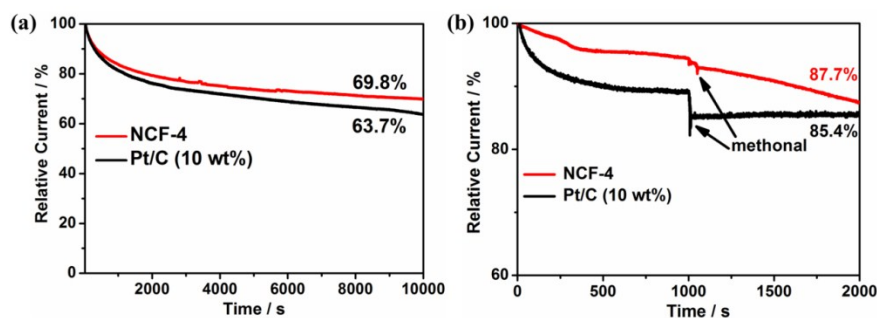

**Fig. S7** The durability (a) and methanol crossover effect test (b) of NCF-4 in O<sub>2</sub>-saturated 0.1 M KOH solution at a rotation rate of 1600 rpm.

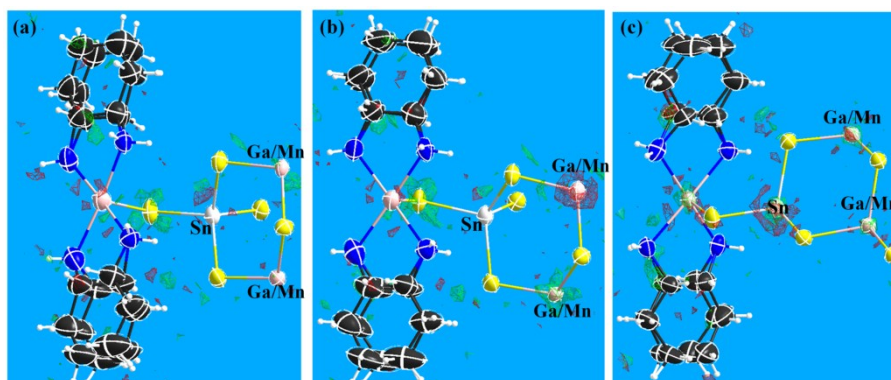

**Fig. S8** The electron cloud density distribution map of Ga:Mn : (a) 1:1 (crystal 1); (b) 2:1 (crystal 1); (c) 1.8:1 (crystal 2).

The EDX and ICP-OES measurements give the ratio of Ga:Mn in T3 cluster of about 2:1. However, the crystallographic data give a normal ADP only when the ratio of Mn:Ga is refined to be 1:1 (Fig. S8a), instead of 2:1 (Fig. S8b). There exists difference in the ratio of Ga/Mn between the results obtained from EDX/ICP-OES and structure refinement. This is because the structure refinement result from a single crystal can't represent the real ratio of Ga:Mn for the bulky solid sample. When we selected the second crystal for data collection, the refinement of the occupancies at Ga/Mn(11) in T3 cluster give the ratio close to 1.8:1 (as shown in the electron cloud density distribution map in Fig. S8c.), which is close to 2 : 1. After comprehensive consideration, we finally select the result obtained from the EDX and ICP-OES measurement to determine the formula of NCF-4.
